# Supplementary material for: Identifying Future Scientists: Predicting Persistence into Research Training
Source: Atypon-hosted journal article supplement (doi:10.1187/cbe.07-04-0020), 2007-12-01
Supplement: appendix_i.pdf [file appendix_i.pdf]

## APPENDIX I

### ***Questions for First (Entrance) Interview***

How did you “get here” in terms of past experiences?

What roles have family, friends, teachers and mentors played in your experiences?

What are your career plans and goals at this point?

What do you think you will get out of this career or the careers you are choosing between?

What do you expect to get from your time at Mayo?

What do you hope to accomplish while you are here?

What is your current view of “research”?

What has been one of your most difficult classes? How did you approach learning the material in this class?

### ***Questions for Second (Exit) Interview***

Tell me a little about the projects you have been working on.

What other programs have you participated in here?

What do you think will stay with you from your experiences here?

Can you identify individuals during your time here who have played the role of mentor for you?

Have there been any role models for you? Any people who were role models of what you don't want to be like in the future?

(Students provided with a verbal list of their expectations from the first interview.) Were your expectations met? Were any of your expectations not met?

(Student provided with a verbal list of what they hoped to accomplish from the first interview.) Did you accomplish the things you wanted to? Did you accomplish anything that you weren't expecting to?

Do you think you have changed or grown during your time here? In what ways?

What is your current view of and interest in research? Do you still see research as part of your future plans?

Have there been any changes in your perception of research or your interest in research as all or part of your career after having been part of this program?

How would you describe this program to a friend?

Is there anything you would change about the program?

Anything else you would like to add?

## **Questions for Third Interview**

### **By Phone 8-12 Months after the End of the Program**

#### **Model Script**

“Thank you for taking the time to help us follow up on the interviews you participated in last summer. We know it takes time before students clarify and understand what they did or did not get out of their summer. We are continuing to look at what students have taken away from their experiences here. We hope that you will continue to provide your candid reflections as you did in the past interviews, as this is the only way we can truly understand our program. Now that it has been (appropriate number) of months since you completed your summer research at Mayo we would like you to reflect back on your experience.”

Tell me what you have been doing since you left Mayo.

Did the Mayo experience have any impact on choices you made in classes, other activities or programs?

From where you stand now, can you see ways you changed or grew during the summer?

These were some of the ways you mentioned during the last interview that you changed or grew during the summer. (Examples provided specific to the student in the interview but not until they had a chance to respond unprompted to previous question.) Do they still seem accurate?

What are your current plans for your career and/or your next educational steps? How did the Mayo experience affect those plans? Have there been other experiences you have had since leaving Mayo which affected your plans?

What is your current interest in and view of “research”? Do you think your time at Mayo influenced this view and interest?

What has stayed with you from your time at Mayo? What kinds of memories or reflections have you had about last summer?

During your exit interview last August, these are a few of the things you thought would stay with you from your summer here: (Key elements from the exit interview for each student are provided, especially those related to career choice and impact of the program.) How do you see the similarities and differences between your thoughts then and now?

Now that you have been away from Mayo for awhile what would you tell a friend to expect or not expect if they came to Mayo for the summer?

Is there anything else you would like to mention about your time at Mayo, or any suggestions for change or improvement you might not have thought of at the time?
